# Supplementary material for: Rationally Engineered AAV Capsids Improve Transduction and Volumetric Spread in the CNS
Source: PubMed Central journal article supplement — Mol Ther Nucleic Acids. 2017 Jun 21;8:184–97. doi: 10.1016/j.omtn.2017.06.011 (PMC5503098; doi:10.1016/j.omtn.2017.06.011), 2017-06-21
Supplement: mmc1.pdf [file mmc1.pdf]

**OMTN, Volume 8**

## **Supplemental Information**

### **Rationally Engineered AAV Capsids Improve Transduction and Volumetric Spread in the CNS**

**Nicholas M. Kanaan, Rhyomi C. Sellnow, Sanford L. Boye, Ben Coberly, Antonette Bennett, Mavis Agbandje-McKenna, Caryl E. Sortwell, William W. Hauswirth, Shannon E. Boye, and Fredric P. Manfredsson**

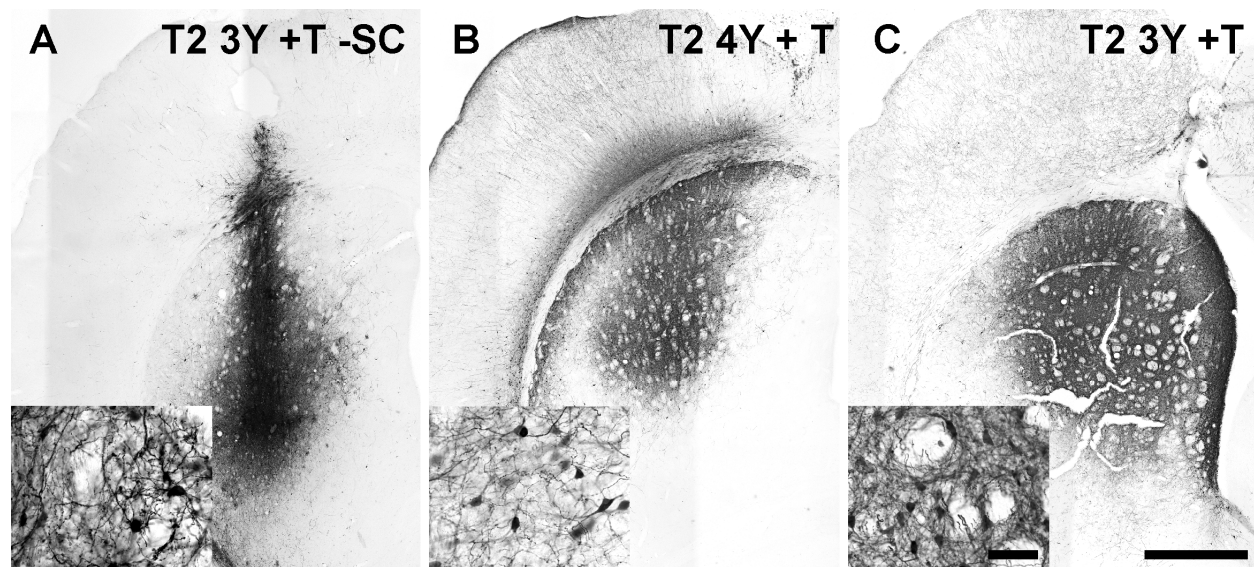

**Figure S1. Incorporation of T-V mutations do not improve neuronal transduction.** Adult Sprague-Dawley rats received intrastriatal injections of an AAV2 vector ( $2\mu\text{l}$  of  $1.2 \times 10^{12}$  vg/ $\mu\text{l}$ ) as defined in **Table 1**. One month later the animals were sacrificed and processed for transgene (green fluorescent protein, GFP) immunoreactivity. **(a-c)** Representative images of GFP immunoreactivity in the striatum following the injection of **(a)** T2 3Y +T -SC ( $n = 8$ ), **(b)** T2 4Y +T ( $n = 7$ ), **(c)** T2 3Y +T ( $n = 8$ ).

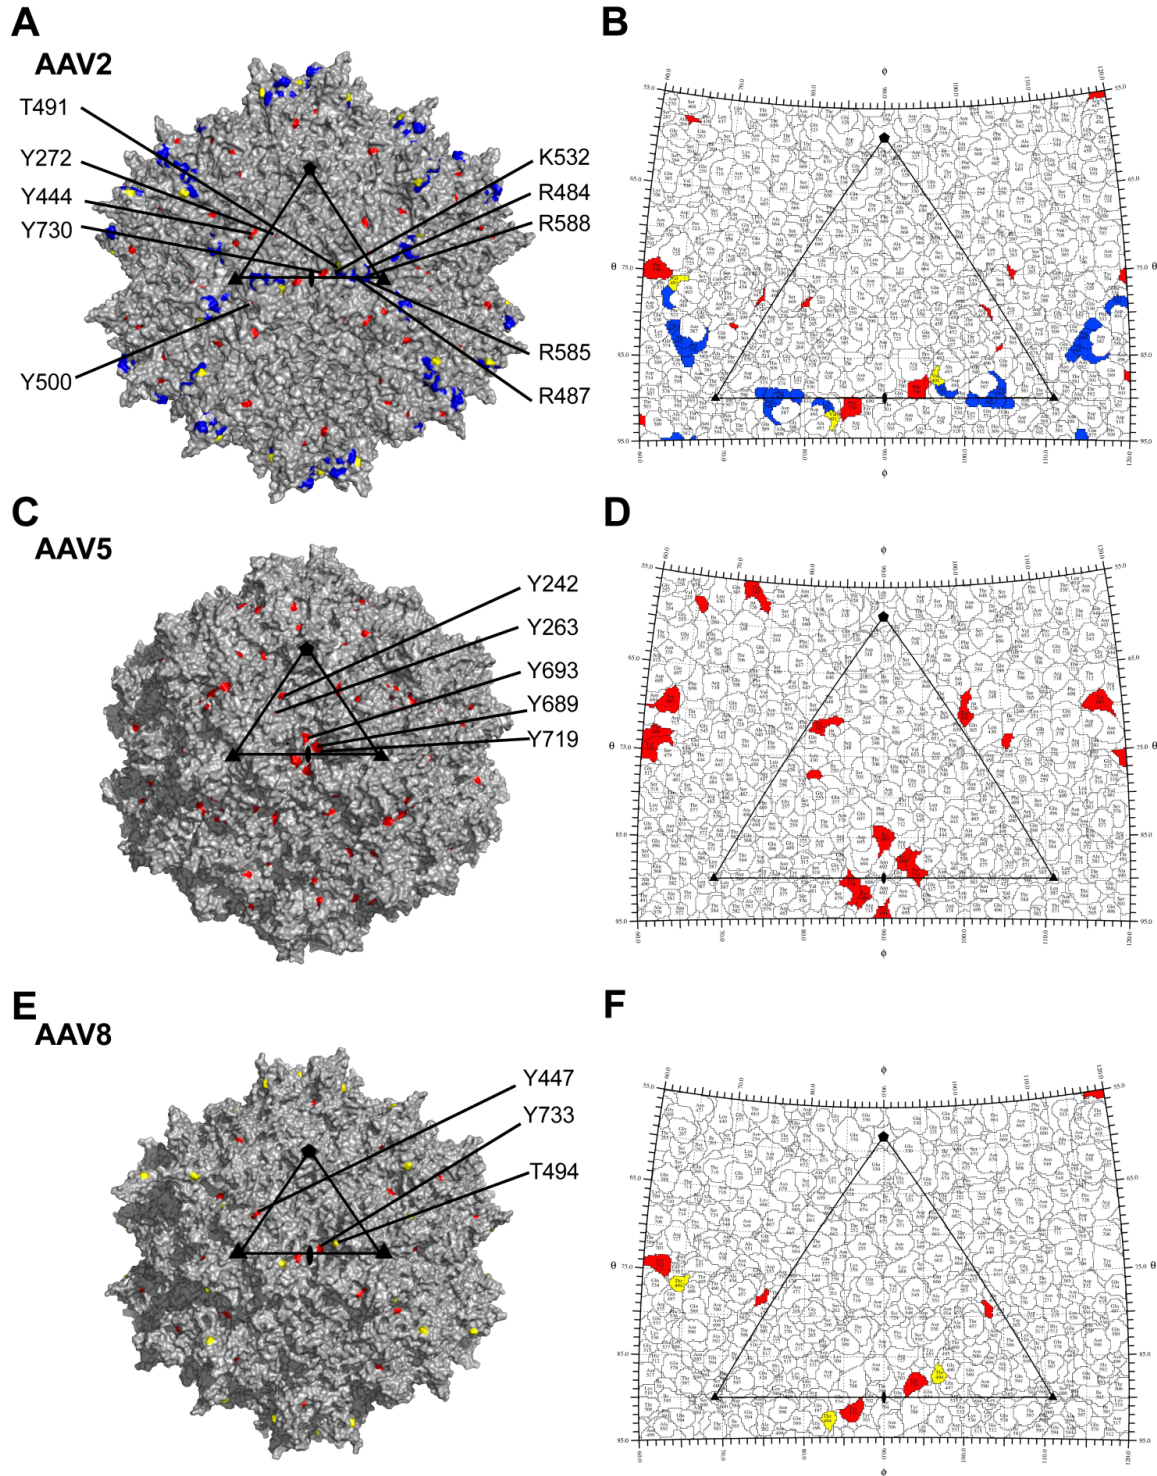

**Figure S2. AAV capsid surface mutants.** (a,c,e) Capsid surface densities for AAV2, AAV5, and AAV8, respectively, showing the positions of amino acids mutated (see **Table 1**). Tyrosine residues are in red, Threonine in yellow, and basic residues in blue. (b,d,f) “Roadmap” image showing the position of the mutated residues colored as in panels a,c,e. The triangle bounded by the two threefold axes (filled triangles) separated by the twofold axis (filled oval) and a fivefold (filled pentagon) depicts a viral asymmetric unit, 60 of which form the capsid.

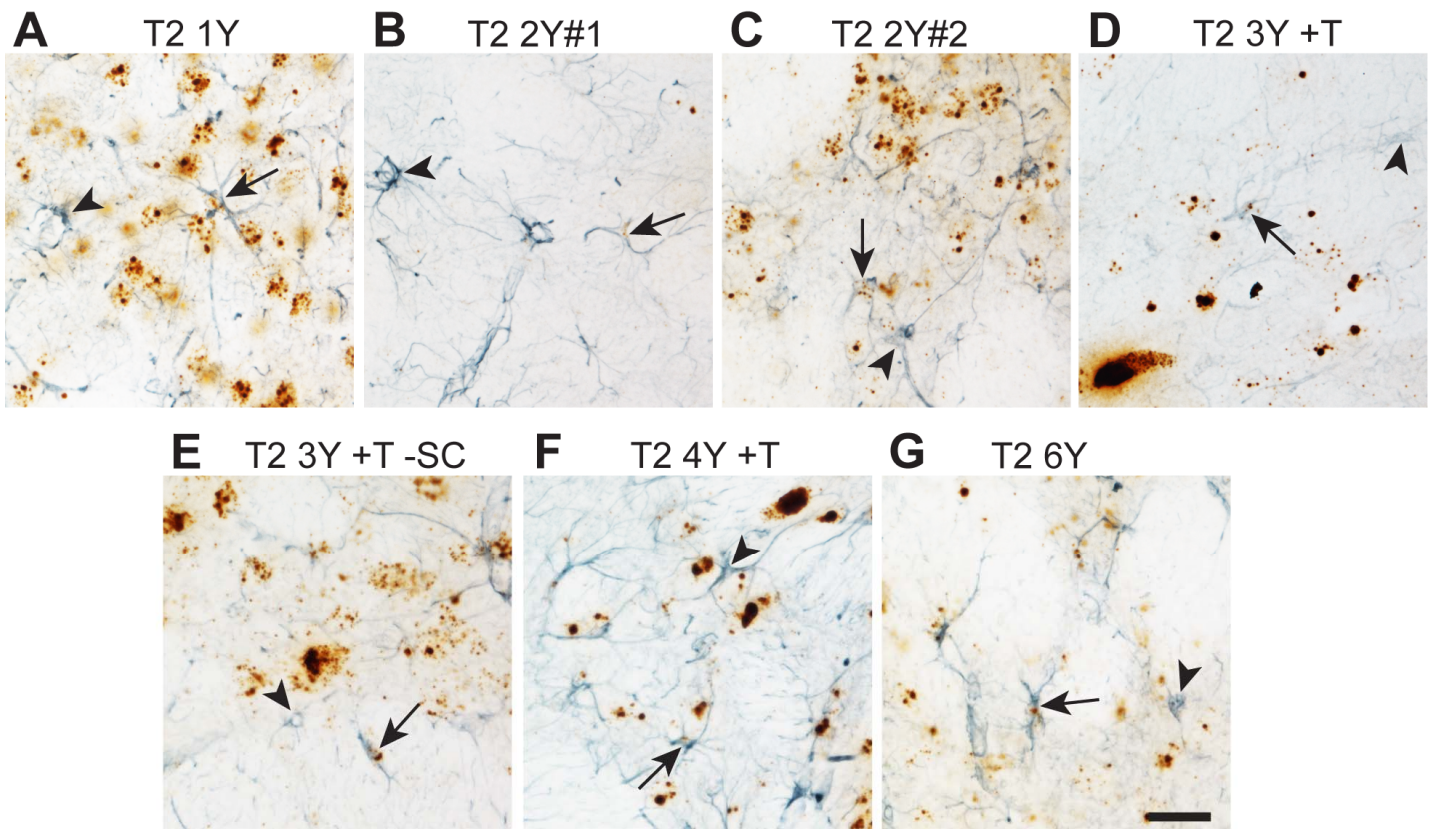

**Figure S3. AAV2 capsid mutants display tropism for astrocytes.** Adult Sprague-Dawley rats received intrastriatal injections of AAV vectors ( $2\mu\text{l}$  of  $1.2 \times 10^{12}$  vg/ $\mu\text{l}$ ) as defined in **Table 1**. One month later, the animals were sacrificed and processed for dual label viral genome ISH (brown punctate staining) and astrocyte IHC (GFAP staining, blue/gray staining). **a-j** Representative sections from animals injected with T2 1Y (**a**), T2 2Y#1 (**b**), T2 2Y#2 (**c**), T2 3Y +T (**d**), T2 3Y +T -SC (**e**), T2 4Y +T (**f**), or T2 6Y (**g**). Brown ISH puncta were found within GFAP-labeled astrocytes with all of the AAVs tested (arrow heads). Scale bar in **g** is  $25\ \mu\text{m}$  and applies to all images.

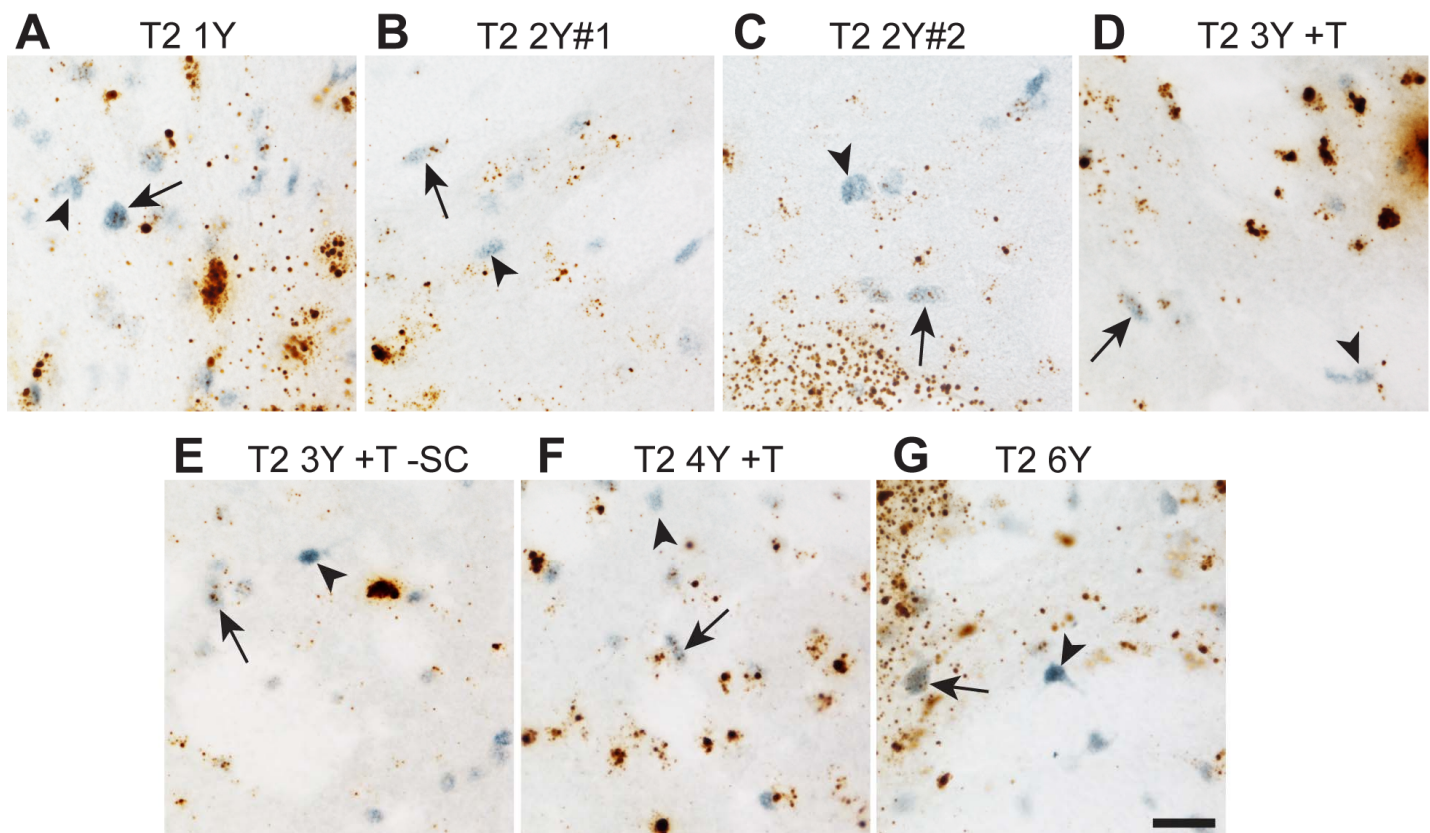

**Figure S4. AAV2 capsid mutants display tropism for oligodendrocytes.** Adult Sprague-Dawley rats received intrastriatal injections of AAV vectors ( $2\mu\text{l}$  of  $1.2 \times 10^{12}$  vg/ $\mu\text{l}$ ) as defined in **Table 1**. One month later, the animals were sacrificed and processed for dual label viral genome ISH (brown punctate staining) and Oligo2 IHC (blue/gray staining). **a-j** Representative sections from animals injected with T2 1Y (**a**), T2 2Y#1 (**b**), T2 2Y#2 (**c**), T2 3Y +T (**d**), T2 3Y +T -SC (**e**), T2 4Y +T (**f**), or T2 6Y (**g**). Brown ISH puncta were found within Oligo2-labeled oligodendrocytes with all of the AAVs tested (arrow heads). Scale bar in **g** is  $25\ \mu\text{m}$  and applies to all images.

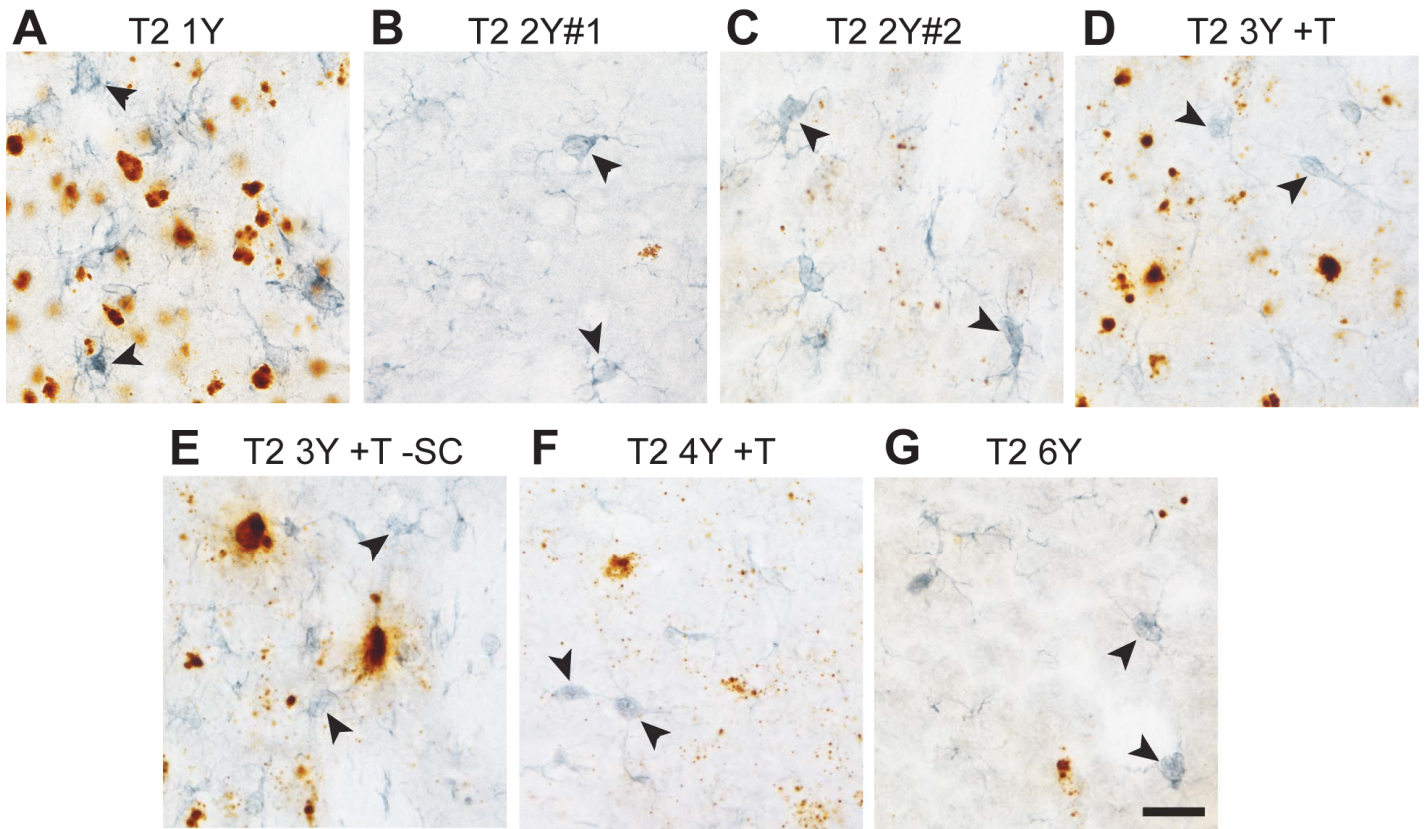

**Figure S5. AAV2 capsid mutants do not confer microglial tropism.** Adult Sprague-Dawley rats received intrastriatal injections of AAV vectors ( $2\mu\text{l}$  of  $1.2 \times 10^{12}$  vg/ $\mu\text{l}$ ) as defined in **Table 1**. One month later, the animals were sacrificed and processed for dual label viral genome ISH (brown punctate staining) and microglia IHC (Iba1 staining, blue/gray staining). **a-j** Representative sections from animals injected with T2 1Y (**a**), T2 2Y#1 (**b**), T2 2Y#2 (**c**), T2 3Y +T (**d**), T2 3Y +T -SC (**e**), T2 4Y +T (**f**), or T2 6Y (**g**). Brown ISH puncta were not found within Iba1-labeled microglia with the AAVs tested (arrow heads). Scale bar in **g** is  $25\ \mu\text{m}$  and applies to all images.

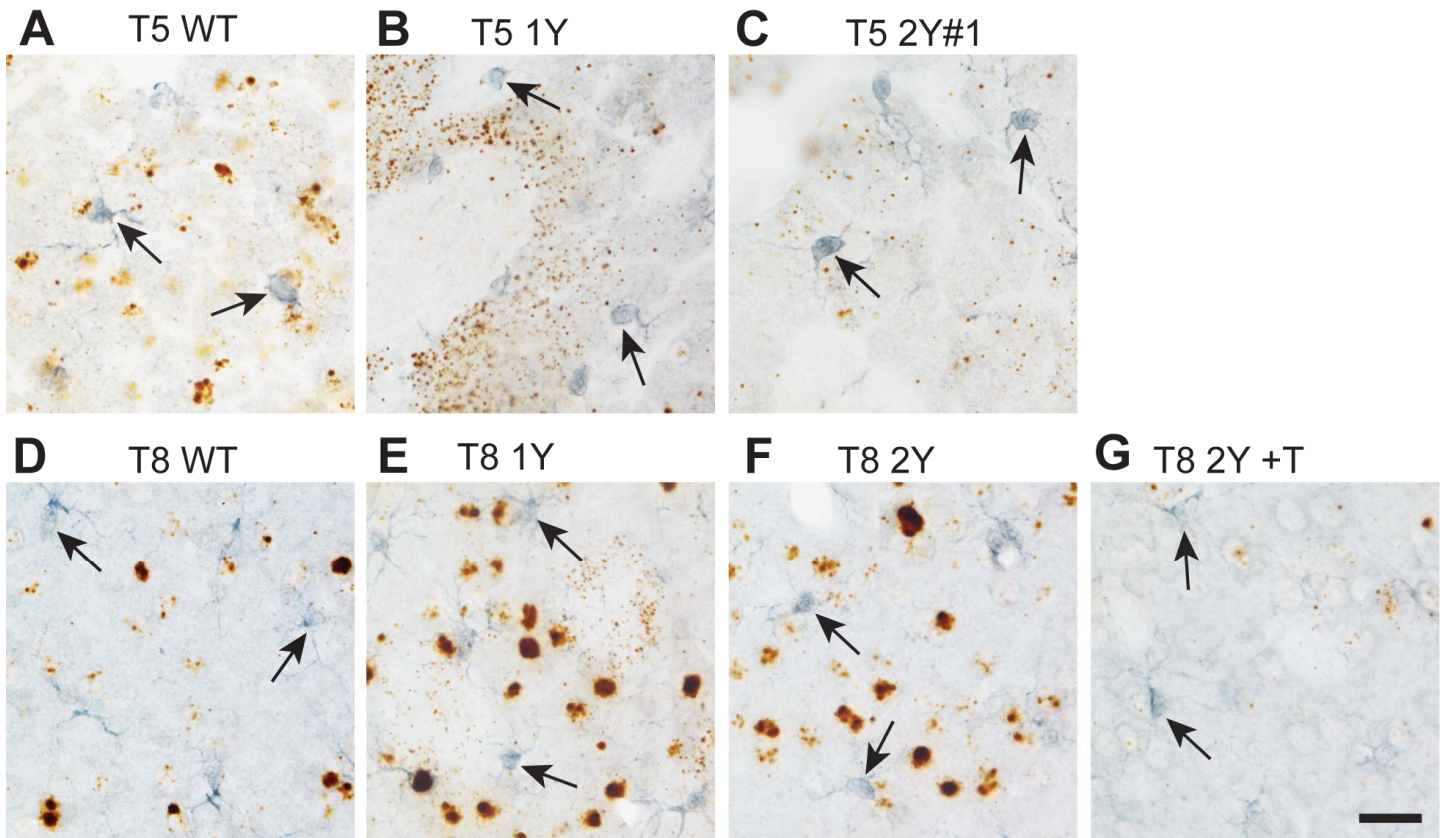

**Figure S6. AAV5 and AAV8 capsid mutants do not confer microglial tropism.** Adult Sprague-Dawley rats received intrastriatal injections of AAV vectors ( $2\mu\text{l}$  of  $1.2 \times 10^{12}$  vg/ $\mu\text{l}$ ) as defined in **Table 1**. One month later, the animals were sacrificed and processed for dual label viral genome ISH (brown punctate staining) and microglia IHC (Iba1 staining, blue/gray staining). **a-j** Representative sections from animals injected with T5 WT (**a**), T5 1Y (**b**), T5 2Y#1 (**c**), T8 WT (**d**), T8 1Y (**e**), T8 2Y (**f**), or T8 3Y +T (**g**). Brown ISH puncta were not found within Iba1-labeled microglia with the AAVs tested (arrow heads). Scale bar in **g** is  $25\ \mu\text{m}$  and applies to all images.
